# Supplementary material
Source: Research Square preprint supplement (doi:10.21203/rs.3.rs-9644386/v1)
Supplement: Supplementary file 1 [file 05d32dacb39487ffb919998e.docx]

**Greenhouse spectral quality affects the post-digestive phenolic levels of tomatoes and probiotic growth**

Samikshya Bhattarai, Deepak K. Jha, Sangeeta Balyan, Shuyang Zhen, and Bhimanagouda S. Patil*

Vegetable and Fruit Improvement Center, Department of Horticultural Sciences, Texas A&M University, 1500 Research Parkway, Suite A120, College Station, TX 77845, USA

*Corresponding author: [bhimanagouda.patil@ag.tamu.edu](mailto:bhimanagouda.patil@ag.tamu.edu)

1. **Tables**

**Table S1**: List of varieties under study.

|  | **Code** | **Variety** | **Company/University** | **Growth habit** | **Description** |
| --- | --- | --- | --- | --- | --- |
| 1 | PR | Plum Regal | Johnny’s Selected Seeds | Determinate, 75 days | Hybrid, round, deep red, firm, ~113 g fruits |
| 2 | THT | TAM Hot-Ty | Texas A&M University | Determinate, 75 days | Hybrid, globose, beefsteak, deep red, medium firmness, 180 to 210 g fruits |

**Table S2**: Light details.

| **Light** | **Company** | **Specifications** | **Peak wavelength** |
| --- | --- | --- | --- |
| Blue | Fluence Bioengineering (Austin, TX, USA) | 45W, 55.9 cm | 444 nm |
| UV-B | Technical Consumer Products (Aurora, OH, USA) | 50W, 61 cm | 309 nm |

**Table S3**: Analysis of variance (ANOVA) of different phenolic compounds in tomato digesta as influenced by varieties (Var) and light treatments (Trt). Significance codes: ‘***’ 0.001; ‘**’ 0.01; ‘*’ 0.05;‘.’ 0.1, ‘NS’ not significant

|  | Variable | Source of variation | P Value | significance |
| --- | --- | --- | --- | --- |
| 1 | *p*-coumaric acid | Var | <0.0001 | *** |
|  |  | Trt | <0.0001 | *** |
|  |  | Var*Trt | <0.0001 | *** |
| 2 | Caffeic acid | Var | 0.11508 | NS |
|  |  | Trt | <0.0001 | *** |
|  |  | Var*Trt | <0.0001 | *** |
| 3 | Sinapic acid | Var | <0.0001 | *** |
|  |  | Trt | <0.0001 | *** |
|  |  | Var*Trt | <0.0001 | *** |
| 4 | Chlorogenic acid | Var | <0.0001 | *** |
|  |  | Trt | <0.0001 | *** |
|  |  | Var*Trt | <0.0001 | *** |
| 5 | Ferulic acid | Var | <0.0001 | *** |
|  |  | Trt | <0.0001 | *** |
|  |  | Var*Trt | <0.0001 | *** |
| 6 | Gallic acid | Var | <0.0001 | *** |
|  |  | Trt | <0.0001 | *** |
|  |  | Var*Trt | <0.0001 | *** |
| 7 | 4-Hydroxybenzoic acid | Var | <0.0001 | *** |
|  |  | Trt | <0.0001 | *** |
|  |  | Var*Trt | <0.0001 | *** |

1. **Figures**

**Figure S1**: Solar spectrum perceived outside and inside the greenhouse at the Southern Crop Improvement Greenhouse Facility at Texas A&M University, College Station, TX.

**Figure S2:** Tomato plants exposed to supplemental light in a greenhouse facility.
